# Supplementary material
Source: PubMed Central journal article supplement (PMC4135739)
Supplement: EC.00066-14_zek999094300so1.pdf [file EC.00066-14_zek999094300so1.pdf]

**SUPPLEMENTAL MATERIAL**

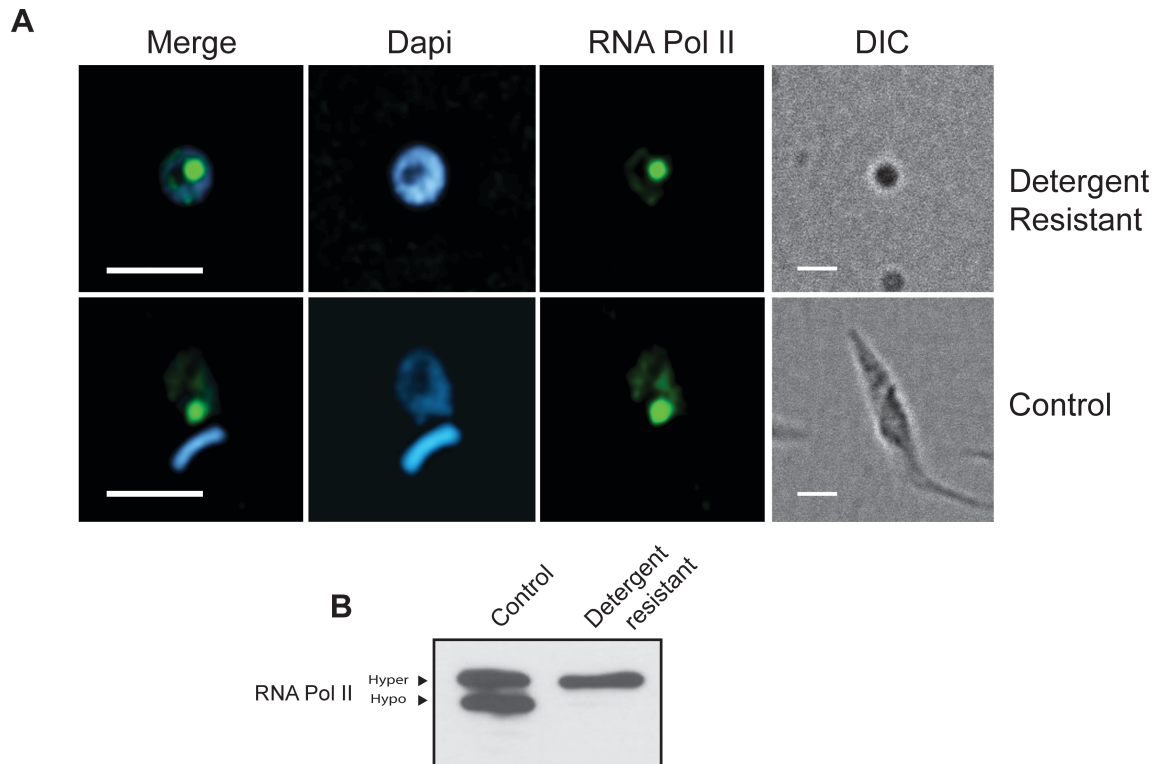

**FIG. S1.** *T. cruzi* RNA Pol II remains attached to the SL-structure in detergent-lysed cells. (A) Deconvolved sections corresponding to immunofluorescence results using anti-RNA Pol II antibodies, the DAPI staining and respective DIC images of epimastigotes previously lysed in non-denaturing conditions and panel (top) and entire epimastigotes. Bars = 2  $\mu$ m. (B) Western blot analysis of the same samples probed with anti-RNA Pol II antibodies.

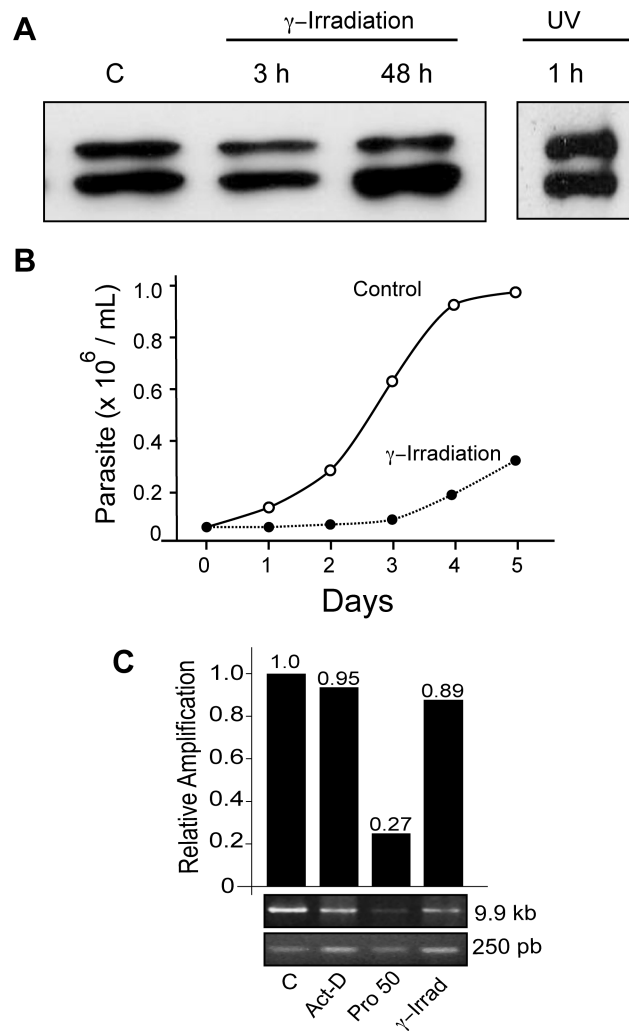

**FIG. S2**  $\gamma$ -Irradiation or UV light does not induce *T. cruzi* RNA Pol II dephosphorylation. Panel (A) shows Western blots using anti-RNA Pol II of total extracts of control (C), or epimastigotes irradiated for 3 h with 500 Gy and further incubated for 48 h, or epimastigotes treated with UV (10,000 J/m<sup>2</sup>). (B) Cell growth of control and  $\gamma$ -irradiated (500 Gy). (C) PCRs of DNA extracted from control cells (C), cells treated for 3 h with 50  $\mu$ g/ml actinomycin D (Act D), 50  $\mu$ g/ml of proflavine (Pro50), or submitted to irradiation (500 Gy). The bars represent the mean ratio between the amplification of the 250 bp and 9.9 kb of duplicate experiments.

Table S1. Oligonucleotides employed in this study.

| Gene              | Oligonucleotide | Oligonucleotide sequence (5' - 3')                            |
|-------------------|-----------------|---------------------------------------------------------------|
| SL-RNA            | SLFow           | CGCTATTATTAGAACAGTTTCTGTAC                                    |
| $\alpha$ -tubulin | PrecTubFow      | GTATGCCTGCGTGTGCGAAA                                          |
|                   | TubRev2         | ACAGCTCCCAGCACGCATTGCC                                        |
| GAPDH             | GAPDHF          | CAAGGTCGGTATCAACGGCT                                          |
|                   | GAPDHR          | TGTTCATATCGACCACCGCC                                          |
| Hsp70             | Hsp70Fow        | AATGACGTACGAGGGAGCCA                                          |
|                   | Hsp70rev        | GATCAGACGCTCCGTGTCCGGTGAAC                                    |
| Hsp83             | Hsp83F          | AGACATTTCGATTCCAGGCT                                          |
|                   | Hsp83R          | GGTTCGTCAGGCTCTGGTAG                                          |
| Tcj2              | TcJ2F           | GGCAATGGTTAAGGAGACTAAGT                                       |
|                   | TcJ2R           | GGGTGGTACTTCAAAGCAAGC                                         |
| XPB               | XPBFow          | CCTCTAGAATGATTGTGGGAGCAAACGGG                                 |
|                   | XPBHARev        | CCGGATCCCTAAGCGTAGTCTGGCACGTCGT<br>AAGGGTATCGCGGATTTGATCGTCTC |
| DNA damage        | Lnsense         | TGCTACAATTGCGGTCGTATGG                                        |
|                   | Lnantisense     | CACCACAATTTGATCCAGGATAG                                       |
|                   | Snsense         | TGCTAGAATTGCGGTCGTATGG                                        |
|                   | Snantisense     | GTCTGACCGCAATTGTAGCAT                                         |
